# Supplementary material for: Diagnostic Performance of Digital versus Film Mammography for Breast-Cancer Screening
Source: Atypon-hosted journal article supplement (doi:10.1056/nejmoa052911), 2005-09-16
Supplement: nejm_pisano_1773sa1.pdf [file nejm_pisano_1773sa1.pdf]

## Supplementary Appendix

This appendix has been provided by the authors to give readers additional information about their work.

Supplement to: Pisano ED, Gatsonis C, Hendrick E, et al. Diagnostic performance of digital versus film mammography for breast-cancer screening. *N Engl J Med* 2005;353:1773-83.

**Supplement Table 1.**

|                                                                     | Digital Mammography                          |       |       |       |       |       |        | Screen Film Mammography |       |       |       |       |       |        |
|---------------------------------------------------------------------|----------------------------------------------|-------|-------|-------|-------|-------|--------|-------------------------|-------|-------|-------|-------|-------|--------|
|                                                                     | Malignancy Score                             |       |       |       |       |       |        |                         |       |       |       |       |       |        |
| All Subjects                                                        | 7                                            | 6     | 5     | 4     | 3     | 2     | 1      | 7                       | 6     | 5     | 4     | 3     | 2     | 1      |
| Number of Tests                                                     | 11                                           | 29    | 69    | 1061  | 2224  | 6588  | 32588  | 17                      | 29    | 70    | 942   | 2291  | 6910  | 32486  |
| Number of Breast Cancers                                            | 10                                           | 18    | 25    | 80    | 45    | 14    | 62     | 13                      | 24    | 25    | 72    | 30    | 24    | 66     |
| Cumulative Tests                                                    | 11                                           | 40    | 109   | 1170  | 3394  | 9982  | 42570* | 17                      | 46    | 116   | 1058  | 3349  | 10259 | 42745* |
| Cumulative True Positives                                           | 10                                           | 28    | 53    | 133   | 178   | 192   | 254**  | 13                      | 37    | 62    | 134   | 164   | 188   | 254**  |
| Sensitivity - All Cancers                                           | 0.039                                        | 0.110 | 0.209 | 0.524 | 0.701 | 0.756 | 1.000  | 0.051                   | 0.146 | 0.244 | 0.528 | 0.646 | 0.740 | 1.000  |
| Sensitivity - Invasive Cancers                                      | 0.051                                        | 0.141 | 0.249 | 0.509 | 0.667 | 0.729 | 1.000  | 0.062                   | 0.170 | 0.277 | 0.537 | 0.650 | 0.757 | 1.000  |
| Specificity All Cancers                                             | 1.000                                        | 1.000 | 0.999 | 0.975 | 0.924 | 0.769 | 0.000  | 1.000                   | 1.000 | 0.999 | 0.978 | 0.925 | 0.763 | 0.000  |
| Positive Predictive Value                                           | 0.909                                        | 0.700 | 0.486 | 0.114 | 0.052 | 0.019 | 0.006  | 0.765                   | 0.804 | 0.535 | 0.127 | 0.049 | 0.018 | 0.006  |
| Number of cases with biopsies                                       | 11                                           | 22    | 41    | 296   | 314   | 210   | 460    | 14                      | 27    | 50    | 271   | 321   | 206   | 467    |
| Sensitivity (positive=4,5,6,7)                                      | 0.524 (se = 0.031)                           |       |       |       |       |       |        | 0.528 (se = 0.031)      |       |       |       |       |       |        |
| Specificity (negative=1,2,3)                                        | 0.975 (se = 0.001)                           |       |       |       |       |       |        | 0.978 (se = 0.001)      |       |       |       |       |       |        |
| PPV                                                                 | 0.114 (se = 0.009)                           |       |       |       |       |       |        | 0.127 (se = 0.010)      |       |       |       |       |       |        |
| Sensitivity difference (DM-SF)                                      | -0.004 , 95% CI (-0.085 , 0.078), p = 1.00   |       |       |       |       |       |        |                         |       |       |       |       |       |        |
| Specificity difference (DM-SF)                                      | -0.003 , 95% CI (-0.005 , -0.001), p = 0.005 |       |       |       |       |       |        |                         |       |       |       |       |       |        |
| <b>Women Under Age 50</b>                                           |                                              |       |       |       |       |       |        |                         |       |       |       |       |       |        |
| Sensitivity (positive=4,5,6,7)                                      | 0.576 (se = 0.064)                           |       |       |       |       |       |        | 0.424 (se = 0.064)      |       |       |       |       |       |        |
| Specificity (negative=1,2,3)                                        | 0.973 (se = 0.001)                           |       |       |       |       |       |        | 0.976 (se = 0.001)      |       |       |       |       |       |        |
| PPV                                                                 | 0.081 (se = 0.013)                           |       |       |       |       |       |        | 0.069 (se = 0.013)      |       |       |       |       |       |        |
| Sensitivity difference (DM-SF)                                      | 0.152 , 95% CI (-0.019 , 0.324), p = 0.09    |       |       |       |       |       |        |                         |       |       |       |       |       |        |
| Specificity difference (DM-SF)                                      | -0.003 , 95% CI (-0.007 , 0.000), p = 0.06   |       |       |       |       |       |        |                         |       |       |       |       |       |        |
| <b>Pre- and peri-menopausal women</b>                               |                                              |       |       |       |       |       |        |                         |       |       |       |       |       |        |
| Sensitivity (positive=4,5,6,7)                                      | 0.531 (se = 0.055)                           |       |       |       |       |       |        | 0.469 (se = 0.055)      |       |       |       |       |       |        |
| Specificity (negative=1,2,3)                                        | 0.974 (se = 0.001)                           |       |       |       |       |       |        | 0.976 (se = 0.001)      |       |       |       |       |       |        |
| PPV                                                                 | 0.095 (se = 0.014)                           |       |       |       |       |       |        | 0.092 (se = 0.014)      |       |       |       |       |       |        |
| Sensitivity difference (DM-SF)                                      | 0.062 , 95% CI (-0.093 , 0.217), p = 0.50    |       |       |       |       |       |        |                         |       |       |       |       |       |        |
| Specificity difference (DM-SF)                                      | -0.002 , 95% CI (-0.006 , 0.001), p = 0.15   |       |       |       |       |       |        |                         |       |       |       |       |       |        |
| <b>Women with extremely dense and heterogeneously dense breasts</b> |                                              |       |       |       |       |       |        |                         |       |       |       |       |       |        |
| Sensitivity (positive=4,5,6,7)                                      | 0.480 (se = 0.045)                           |       |       |       |       |       |        | 0.472 (se = 0.045)      |       |       |       |       |       |        |
| Specificity (negative=1,2,3)                                        | 0.972 (se = 0.001)                           |       |       |       |       |       |        | 0.974 (se = 0.001)      |       |       |       |       |       |        |
| PPV                                                                 | 0.098 (se = 0.012)                           |       |       |       |       |       |        | 0.102 (se = 0.013)      |       |       |       |       |       |        |
| Sensitivity difference (DM-SF)                                      | 0.008 , 95% CI (-0.114 , 0.130), p = 1.00    |       |       |       |       |       |        |                         |       |       |       |       |       |        |
| Specificity difference (DM-SF)                                      | -0.002 , 95% CI (-0.005 , 0.001), p = 0.28   |       |       |       |       |       |        |                         |       |       |       |       |       |        |

Supplement Table 1 Legend. Test Performance using the 7-point malignancy scale with reference standard information at 365 days of follow-up. (PPV = Positive Predictive Value, se = Standard Error, CI = Confidence Interval).

Footnotes Supplement Table 1.

\*Numbers of patients with full follow-up information differs from the 42760 women with full reference standard information because there were 190 women who did not receive digital mammograms and 15 women who did not receive film mammograms.

\*\*Note that only 254 cancers were diagnosed in the 365 day follow-up interval.

|                                                                     | Digital Mammography                         |       |       |       |       |        | Screen Film Mammography |       |       |       |       |        |
|---------------------------------------------------------------------|---------------------------------------------|-------|-------|-------|-------|--------|-------------------------|-------|-------|-------|-------|--------|
|                                                                     | BIRADS Score                                |       |       |       |       |        |                         |       |       |       |       |        |
| All Subjects                                                        | 5                                           | 4     | 0     | 3     | 2     | 1      | 5                       | 4     | 0     | 3     | 2     | 1      |
| No. of Tests                                                        | 9                                           | 23    | 3623  | 68    | 8564  | 30283  | 8                       | 23    | 3648  | 53    | 8113  | 30900  |
| No. of Breast Cancers                                               | 7                                           | 8     | 171   | 0     | 45    | 103    | 7                       | 6     | 161   | 0     | 42    | 119    |
| Cum. No. of Tests                                                   | 9                                           | 32    | 3655  | 3723  | 12287 | 42570* | 8                       | 31    | 3679  | 3732  | 11845 | 42745* |
| Cum. No. True Positives                                             | 7                                           | 15    | 186   | 186   | 231   | 334**  | 7                       | 13    | 174   | 174   | 216   | 335    |
| Sensitivity: All Cancers                                            | 0.021                                       | 0.045 | 0.557 | 0.557 | 0.692 | 1.000  | 0.021                   | 0.039 | 0.519 | 0.519 | 0.645 | 1.000  |
| Sensitivity: Invasive Cancers                                       | 0.028                                       | 0.057 | 0.667 | 0.667 | 0.774 | 1.000  | 0.034                   | 0.057 | 0.655 | 0.655 | 0.768 | 1.000  |
| Specificity: All Cancers                                            | 1.000                                       | 1.000 | 0.918 | 0.916 | 0.715 | 0.000  | 1.000                   | 1.000 | 0.917 | 0.916 | 0.726 | 0.000  |
| PPV                                                                 | 0.778                                       | 0.469 | 0.051 | 0.050 | 0.019 | 0.008  | 0.875                   | 0.419 | 0.047 | 0.047 | 0.018 | 0.008  |
| No. of cases with biopsies                                          | 8                                           | 18    | 655   | 4     | 127   | 235    | 8                       | 19    | 658   | 3     | 105   | 256    |
| Sensitivity (positive=0,4,5)                                        | 0.557 (se = 0.027)                          |       |       |       |       |        | 0.519 (se = 0.027)      |       |       |       |       |        |
| Specificity (negative=1,2,3)                                        | 0.918 (se = 0.001)                          |       |       |       |       |        | 0.917 (se = 0.001)      |       |       |       |       |        |
| PPV                                                                 | 0.051 (se = 0.004)                          |       |       |       |       |        | 0.047 (se = 0.004)      |       |       |       |       |        |
| Sensitivity difference (DM-SF)                                      | 0.038 , 95% CI (-0.029 , 0.100) , p=0.29    |       |       |       |       |        |                         |       |       |       |       |        |
| Specificity difference (DM-SF)                                      | 0.001 , 95% CI (-0.003 , 0.004) , p=0.72    |       |       |       |       |        |                         |       |       |       |       |        |
| <b>Women under age 50</b>                                           |                                             |       |       |       |       |        |                         |       |       |       |       |        |
| Sensitivity (positive=0,4,5)                                        | 0.681 (se = 0.055)                          |       |       |       |       |        | 0.444 (se = 0.059)      |       |       |       |       |        |
| Specificity (negative=1,2,3)                                        | 0.901 (se = 0.003)                          |       |       |       |       |        | 0.901 (se = 0.003)      |       |       |       |       |        |
| PPV                                                                 | 0.034 (se = 0.005)                          |       |       |       |       |        | 0.022 (se = 0.004)      |       |       |       |       |        |
| Sensitivity difference (DM-SF)                                      | 0.237 , 95% CI (0.092 , 0.381) , p = 0.002  |       |       |       |       |        |                         |       |       |       |       |        |
| Specificity difference (DM-SF)                                      | 0.000 , 95% CI (-0.005 , 0.007) , p = 0.87  |       |       |       |       |        |                         |       |       |       |       |        |
| <b>Pre- and peri-menopausal women</b>                               |                                             |       |       |       |       |        |                         |       |       |       |       |        |
| Sensitivity (positive=0,4,5)                                        | 0.650 (se = 0.048)                          |       |       |       |       |        | 0.430 (se = 0.050)      |       |       |       |       |        |
| Specificity (negative=1,2,3)                                        | 0.904 (se = 0.002)                          |       |       |       |       |        | 0.902 (se = 0.002)      |       |       |       |       |        |
| PPV                                                                 | 0.042 (se = 0.005)                          |       |       |       |       |        | 0.027 (se = 0.004)      |       |       |       |       |        |
| Sensitivity difference (DM-SF)                                      | 0.220 , 95% CI (0.091 , 0.350) , p = <0.001 |       |       |       |       |        |                         |       |       |       |       |        |
| Specificity difference (DM-SF)                                      | 0.002 , 95% CI (-0.003 , 0.009) , p = 0.32  |       |       |       |       |        |                         |       |       |       |       |        |
| <b>Women with extremely dense and heterogeneously dense breasts</b> |                                             |       |       |       |       |        |                         |       |       |       |       |        |
| Sensitivity (positive=0,4,5)                                        | 0.567 (se = 0.039)                          |       |       |       |       |        | 0.436 (se = 0.039)      |       |       |       |       |        |
| Specificity (negative=1,2,3)                                        | 0.906 (se = 0.002)                          |       |       |       |       |        | 0.902 (se = 0.002)      |       |       |       |       |        |
| PPV                                                                 | 0.048 (se = 0.005)                          |       |       |       |       |        | 0.036 (se = 0.004)      |       |       |       |       |        |
| Sensitivity difference (DM-SF)                                      | 0.131 , 95% CI (0.034 , 0.222) , p = 0.008  |       |       |       |       |        |                         |       |       |       |       |        |
| Specificity difference (DM-SF)                                      | 0.004 , 95% CI (-0.001 , 0.010) , p = 0.08  |       |       |       |       |        |                         |       |       |       |       |        |

**Supplement Table 2.**

Supplement Table 2 Legend. Test Performance using the BIRADS® scale with reference standard information at 455 days of follow-up. (PPV = Positive Predictive Value, se = Standard Error, CI = Confidence Interval).

## Footnotes

\*Numbers of patients with full follow-up information differs from the 42760 women with full reference standard information because there were 190 women who did not receive digital mammograms and 15 women who did not receive film mammograms.

\*\*Note that one patient diagnosed with cancer did not undergo digital mammography.
